# Supplementary material for: Changes in Meat of Hu Sheep during Postmortem Aging Based on ACQUITY UPLC I-Class Plus/VION IMS QTof
Source: MDPI journal article supplement (doi:10.3390/foods13010174), 2024-01-04
Supplement: s1 [file s1]

**Table S1:** Differential compounds identified in positive mode.

| Compound                                   | RT (min) | VIP    | MIN P    | MAX FC    |
|--------------------------------------------|----------|--------|----------|-----------|
| 7-Dehydrocholesterol                       | 16.94    | 1.0845 | 1.54E-06 | 0.10403   |
| Adenosine monophosphate                    | 0.94     | 1.0692 | 5.07E-03 | 0.1461    |
| Glycocholic acid                           | 8.21     | 1.0486 | 3.81E-04 | 0.0922731 |
| Hypoxanthine                               | 1.60     | 1.2362 | 1.55E-10 | 2.6158    |
| L-Proline                                  | 13.02    | 1.2902 | 6.60E-11 | 2.42194   |
| Inosine                                    | 1.60     | 1.1783 | 1.13E-05 | 4.14642   |
| Sphinganine                                | 10.63    | 1.0807 | 1.87E-07 | 7.40301   |
| 3b,17b-Dihydroxyetiocholan                 | 11.05    | 1.2203 | 3.33E-05 | 2.0505    |
| 3-Methylindole                             | 8.06     | 1.2503 | 6.84E-05 | 0.437358  |
| Indoleacrylic acid                         | 3.50     | 1.1555 | 1.73E-06 | 2.33111   |
| Undecanoic acid                            | 10.19    | 1.4279 | 1.43E-10 | 3.56285   |
| Enkephalin L                               | 16.51    | 1.1233 | 1.98E-03 | 0.24478   |
| N2-Succinyl-L-glutamic acid 5-semialdehyde | 9.37     | 1.3988 | 3.65E-09 | 2.13017   |
| N1-Acetylspermidine                        | 14.68    | 1.2693 | 1.02E-03 | 3.82457   |
| 3-Methoxytyrosine                          | 8.27     | 1.6412 | 4.88E-05 | 2.48698   |
| Monoisobutyl phthalic acid                 | 10.33    | 1.4437 | 3.13E-11 | 2.61366   |
| Dicrocin                                   | 13.26    | 1.3181 | 4.68E-08 | 2.05789   |
| Desmosterol                                | 17.63    | 1.3727 | 1.88E-06 | 0.134854  |
| LysoPC(18:1(9Z)/0:0)                       | 9.80     | 1.1244 | 4.38E-07 | 3.44659   |
| N-Methylnicotinamide                       | 8.81     | 1.3320 | 1.85E-04 | 2.95787   |
| Testosterone glucuronide                   | 14.80    | 1.4248 | 5.75E-06 | 0.124385  |
| Cinnamaldehyde                             | 8.59     | 1.6872 | 2.64E-06 | 2.56298   |
| Tryptophol                                 | 10.30    | 1.1046 | 2.51E-05 | 0.274331  |

|                                                     |       |        |          |             |
|-----------------------------------------------------|-------|--------|----------|-------------|
| (2E)-Tetradecenoyl-CoA                              | 15.52 | 1.0385 | 1.37E-02 | 0.181034    |
| Phytosphingosine                                    | 7.32  | 1.2752 | 1.55E-03 | 3.4605      |
| 9,10-DHOME                                          | 6.45  | 1.8056 | 3.35E-08 | 3.22173     |
| FAPy-adenine                                        | 0.94  | 1.0645 | 4.08E-03 | 0.11126     |
| Cer(d18:1/22:0)                                     | 17.65 | 1.2753 | 1.59E-04 | 0.000191585 |
| Cer(d18:1/24:0)                                     | 15.27 | 1.1066 | 5.44E-06 | 0.00376505  |
| Escitalopram                                        | 8.70  | 1.0356 | 1.66E-02 | 0.371297    |
| TG(16:0/16:0/18:1(9Z))                              | 17.62 | 1.3167 | 7.99E-13 | 0.138951    |
| TG(16:0/18:0/18:2(9Z,12Z))                          | 15.27 | 1.3851 | 1.30E-16 | 0.202441    |
| Phenylacetaldehyde                                  | 8.58  | 1.6699 | 2.66E-07 | 5.34375     |
| CPA(18:0/0:0)                                       | 9.68  | 1.3112 | 5.71E-08 | 6.5317      |
| DG(14:1(9Z)/14:1(9Z)/0:0)                           | 9.26  | 1.2055 | 1.01E-06 | 0.284772    |
| DG(14:1(9Z)/16:1(9Z)/0:0)                           | 9.69  | 1.3040 | 7.00E-09 | 0.0101556   |
| LysoPA(0:0/18:0)                                    | 9.69  | 1.2091 | 5.74E-07 | 3.4318      |
| PC(16:0/20:1(11Z))                                  | 13.03 | 1.3313 | 9.95E-08 | 0.0657534   |
| PC(18:0/16:0)                                       | 13.04 | 1.4029 | 3.86E-06 | 0.244832    |
| PC(18:2(9Z,12Z)/16:0)                               | 11.76 | 1.2954 | 1.67E-04 | 0.0721756   |
| PC(18:3(6Z,9Z,12Z)/22:6(4Z,7Z,10Z,13Z,16Z,19Z))     | 12.01 | 1.2578 | 7.08E-04 | 0.038114    |
| PC(22:6(4Z,7Z,10Z,13Z,16Z,19Z)/20:4(5Z,8Z,11Z,14Z)) | 4.45  | 1.1355 | 1.54E-06 | 0.333592    |
| PE(14:0/24:0)                                       | 4.90  | 1.2762 | 1.05E-08 | 0.391616    |
| PE(14:1(9Z)/22:0)                                   | 12.22 | 1.1505 | 1.62E-06 | 5.60701     |
| PE(15:0/22:0)                                       | 11.76 | 1.2211 | 5.31E-09 | 2.92555     |
| PE(15:0/22:1(13Z))                                  | 11.76 | 1.2579 | 1.31E-08 | 3.48521     |
| PI(16:0/18:0)                                       | 18.12 | 1.3937 | 1.07E-11 | 0.0399227   |
| PI(16:0/20:2(11Z,14Z))                              | 18.12 | 1.3449 | 1.72E-12 | 0.000608089 |
| PI(16:0/22:4(10Z,13Z,16Z,19Z))                      | 18.12 | 1.3288 | 1.47E-11 | 0.0166163   |

|                                                |       |        |          |            |
|------------------------------------------------|-------|--------|----------|------------|
| PI(18:0/22:4(10Z,13Z,16Z,19Z))                 | 15.48 | 1.2545 | 1.99E-09 | 0.00179764 |
| LysoPC(16:0/0:0)                               | 9.52  | 1.2091 | 6.29E-09 | 3.27169    |
| LysoPC(18:0/0:0)                               | 10.85 | 1.0605 | 1.66E-04 | 2.02727    |
| LysoPC(18:2(9Z,12Z)/0:0)                       | 8.95  | 1.0389 | 1.01E-04 | 2.10668    |
| LysoPC(20:0/0:0)                               | 4.73  | 1.2112 | 9.47E-05 | 0.18359    |
| LysoPC(P-16:0/0:0)                             | 9.85  | 1.1504 | 3.33E-06 | 3.97018    |
| LysoPE(0:0/18:0)                               | 10.55 | 1.4784 | 2.70E-06 | 4.33194    |
| LysoPA(O-18:0/0:0)                             | 10.30 | 1.3642 | 6.94E-09 | 4.01606    |
| LysoPE(P-16:0/0:0)                             | 9.73  | 1.2188 | 1.91E-08 | 5.4446     |
| gamma-Glutamylvaline                           | 0.97  | 1.3523 | 2.33E-06 | 69.8801    |
| PE(P-18:0/20:2(11Z,14Z))                       | 11.76 | 1.2961 | 4.74E-10 | 0.0840917  |
| PE(P-18:1(11Z)/20:3(8Z,11Z,14Z))               | 11.77 | 1.4050 | 1.00E-06 | 0.0841142  |
| LysoPE(0:0/15:0)                               | 9.90  | 1.1341 | 1.40E-07 | 151.176    |
| MG(0:0/20:1(11Z)/0:0)                          | 8.71  | 1.4157 | 2.17E-03 | 0.0520286  |
| 4-(Methylnitrosamino)-1-(3-pyridyl)-1-butanone | 13.63 | 1.2845 | 3.09E-09 | 3.96652    |
| Cer(d18:0/14:0)                                | 11.49 | 1.5027 | 1.50E-08 | 2.21496    |
| SM(d18:1/24:1(15Z))                            | 12.62 | 1.4618 | 4.69E-13 | 0.0957293  |
| Histidinal                                     | 13.30 | 1.3567 | 4.60E-13 | 3.15894    |
| Methylarsonite                                 | 18.21 | 1.0455 | 6.45E-03 | 0.491093   |
| 10,11-Dihydro-12R-hydroxy-leukotriene E4       | 4.25  | 1.1935 | 4.23E-09 | 0.129024   |
| Acetamidopropanal                              | 13.11 | 1.2957 | 3.63E-11 | 2.23829    |
| Neuromedin N (1-4)                             | 10.33 | 1.0521 | 1.20E-02 | 0.0403297  |
| Fumarycarnitine                                | 12.03 | 1.4220 | 2.20E-12 | 3.65317    |
| 1b,3a,7b-Trihydroxy-5b-cholanoic acid          | 12.32 | 1.2471 | 6.70E-08 | 2.28968    |
| Monoethylhexyl phthalic acid                   | 10.32 | 1.3609 | 1.33E-11 | 2.44375    |
| Pristanoylglycine                              | 8.84  | 1.3402 | 1.43E-02 | 5.44038    |

|                                                     |       |        |          |             |
|-----------------------------------------------------|-------|--------|----------|-------------|
| Tryptophanamide                                     | 8.18  | 1.7118 | 2.61E-05 | 0.446641    |
| 3-Hydroxy-11Z-octadecenoylcarnitine                 | 4.87  | 1.2456 | 1.57E-06 | 0.0318257   |
| PC(O-22:2(13Z,16Z)/22:3(10Z,13Z,16Z))               | 13.15 | 1.0771 | 1.01E-03 | 0.121256    |
| SM(d18:1/26:1(17Z))                                 | 16.34 | 1.2566 | 3.94E-07 | 0.0540868   |
| PGP(18:1(11Z)/22:4(7Z,10Z,13Z,16Z))                 | 11.01 | 1.1931 | 1.71E-08 | 0.000108293 |
| 4-Hydroxypropofol                                   | 11.77 | 1.1322 | 1.85E-06 | 2.1641      |
| Azithromycin                                        | 11.96 | 1.3466 | 5.50E-07 | 5.44225     |
| Ethambutol                                          | 12.90 | 1.3167 | 1.24E-12 | 3.11991     |
| Eszopiclone                                         | 10.24 | 1.2702 | 3.65E-11 | 4.20995     |
| Carteolol                                           | 9.69  | 1.0615 | 1.46E-08 | 5.10115     |
| Docosanol                                           | 12.63 | 1.2690 | 1.09E-10 | 3.67974     |
| Nystatin                                            | 12.40 | 1.1696 | 6.16E-10 | 0.0279784   |
| Proparacaine                                        | 10.23 | 1.3057 | 1.84E-13 | 13.0974     |
| Azlocillin                                          | 11.71 | 1.2460 | 5.78E-10 | 4.77165     |
| Procarbazine                                        | 11.08 | 1.2308 | 3.10E-04 | 0.0283521   |
| Fluoxymesterone                                     | 10.61 | 1.9808 | 2.31E-06 | 0.0242274   |
| Arginylthreonine                                    | 17.22 | 1.3044 | 1.10E-06 | 4.26234     |
| Glutaminylthreonine                                 | 4.25  | 1.2111 | 3.58E-07 | 0.0821329   |
| Glycylvaline                                        | 11.91 | 1.1779 | 2.68E-08 | 129.546     |
| Phenylalanylvaline                                  | 15.74 | 1.0491 | 1.33E-02 | 0.415649    |
| Tryptophyl-Phenylalanine                            | 11.76 | 1.7489 | 6.58E-06 | 0.487791    |
| gamma2-Solamarine                                   | 14.98 | 1.2018 | 8.77E-04 | 0.187652    |
| (2R,3R,4R)-2-Amino-4-hydroxy-3-methylpentanoic acid | 10.54 | 1.2266 | 1.11E-08 | 2.3193      |
| Torvoside C                                         | 4.78  | 1.0789 | 2.67E-04 | 0.206384    |
| (4-Methylphenyl)acetaldehyde                        | 8.60  | 1.6833 | 2.49E-07 | 2.2847      |
| Cinnamyl alcohol                                    | 10.81 | 1.2869 | 2.36E-05 | 0.491555    |

|                                                                                           |       |        |          |            |
|-------------------------------------------------------------------------------------------|-------|--------|----------|------------|
| L-Citronellol glucoside                                                                   | 11.30 | 1.3147 | 8.95E-12 | 2.3217     |
| (3beta,22E)-26,27-Dinorergosta-5,22-dien-3-ol                                             | 15.61 | 1.0600 | 6.37E-05 | 0.390283   |
| Artemidiol                                                                                | 7.50  | 1.0162 | 9.51E-06 | 0.131569   |
| alpha,alpha-Dimethylanisalacetone                                                         | 10.43 | 1.4143 | 7.45E-11 | 2.45622    |
| 5-Nonadecyl-1,3-benzenediol                                                               | 12.64 | 1.5290 | 2.02E-06 | 2.66037    |
| Annonisin                                                                                 | 11.76 | 1.8678 | 1.25E-10 | 0.37835    |
| Arachisprenol 11                                                                          | 16.18 | 1.9012 | 3.80E-07 | 0.00506078 |
| Stearyl citrate                                                                           | 14.79 | 1.2723 | 1.17E-03 | 0.340148   |
| 1,1'-(Tetrahydro-6a-hydroxy-2,3a,5-trimethylfuro[2,3-d]-1,3-dioxole-2,5-diyl)bis-ethanone | 9.00  | 1.2818 | 2.33E-07 | 0.0195493  |
| Triethanolamine                                                                           | 13.39 | 1.3102 | 2.59E-12 | 2.33451    |
| 3-(2-Methylpropanoyloxy)-8-(2-methylbutanoyloxy)-9,10-epoxy-p-mentha-1,3,5-triene         | 15.10 | 1.6811 | 5.18E-05 | 0.069134   |
| Lepidine B                                                                                | 8.81  | 1.2914 | 1.88E-07 | 0.299667   |
| Osmaronin                                                                                 | 12.67 | 1.3599 | 2.83E-13 | 4.31502    |
| Methyl 15-cyanopentadecanoate                                                             | 9.33  | 1.1661 | 2.39E-05 | 0.369112   |
| alpha-Tocopherol succinate                                                                | 4.61  | 1.1425 | 1.89E-05 | 0.306285   |
| 2-Diethylaminoethanol                                                                     | 18.12 | 1.3034 | 1.78E-12 | 2.08141    |
| Withaperuvine H                                                                           | 5.56  | 1.9502 | 7.52E-07 | 4.48527    |
| Apterin                                                                                   | 6.83  | 1.2472 | 3.78E-07 | 0.459751   |
| Digitoxigenin 3-[glucosyl-(1->6)-glucosyl-(1->4)-2,6-dideoxyribohexoside]                 | 8.60  | 1.5232 | 4.61E-08 | 0.281788   |
| Morellinol                                                                                | 10.68 | 1.4809 | 1.19E-03 | 4477.17    |
| Methyl linoleate                                                                          | 13.02 | 1.2429 | 4.16E-12 | 2.22827    |
| 8,8-Diethoxy-2,6-dimethyl-2-octanol                                                       | 10.43 | 1.4817 | 2.31E-11 | 3.69368    |
| Tomatidine                                                                                | 10.01 | 2.0814 | 1.90E-07 | 2.11146    |
| Ginsenoside Rc                                                                            | 5.01  | 1.3404 | 6.76E-12 | 0.31952    |
| Ganoderic acid C1                                                                         | 11.88 | 1.3851 | 6.86E-07 | 2.36464    |

|                                              |       |        |          |             |
|----------------------------------------------|-------|--------|----------|-------------|
| Squamone                                     | 15.56 | 1.4851 | 3.69E-04 | 0.241666    |
| Ganoderic acid G                             | 7.06  | 1.3979 | 2.79E-10 | 0.217817    |
| Shyobunyl acetate                            | 7.74  | 1.0098 | 5.05E-04 | 0.304581    |
| 2-(3-Phenylpropyl)pyridine                   | 10.16 | 1.1067 | 7.78E-05 | 0.489613    |
| Sclareol                                     | 18.12 | 1.2857 | 5.30E-10 | 0.00866076  |
| 7',8'-Dihydro-8'-hydroxycitraniaxanthin      | 10.81 | 1.3795 | 9.74E-07 | 0.212477    |
| 4-[(2-Methyl-3-furanyl)thio]-5-nonanone      | 12.04 | 1.6598 | 4.10E-04 | 12.9203     |
| Butyl 2-decenoate                            | 13.83 | 1.2720 | 2.78E-07 | 2.38113     |
| Pentabromodiphenyl ethers                    | 14.69 | 1.3333 | 1.30E-05 | 0.000156733 |
| (E)-26,27-Dinoregosta-4,22-dien-3-one        | 10.52 | 1.0239 | 2.10E-03 | 3.34742     |
| Petanin                                      | 10.99 | 1.2599 | 3.45E-07 | 0.105348    |
| Isolimonic acid                              | 11.89 | 1.3590 | 6.82E-04 | 2.21482     |
| 3-(Isothiocyanatomethyl)-1-methoxy-1H-indole | 5.21  | 1.0242 | 3.39E-04 | 0.217863    |
| Dilauryl 3,3'-thiodipropionate               | 4.97  | 1.3146 | 2.41E-12 | 0.1011      |
| Polyporusterone C                            | 12.60 | 1.1331 | 6.40E-06 | 2.33344     |
| Glyuranolide                                 | 11.91 | 1.3467 | 5.15E-06 | 2.48445     |
| Torvanol A                                   | 11.41 | 1.1534 | 2.10E-10 | 5.0051      |
| Lupeoside                                    | 5.53  | 1.6884 | 2.78E-03 | 0.396134    |
| Fenugreekine                                 | 0.92  | 1.0096 | 5.16E-07 | 0.0927939   |
| Dihydrowyerone acid                          | 8.59  | 1.6667 | 1.07E-06 | 2.83685     |
| Dihydrowyerol                                | 11.89 | 1.2975 | 2.21E-06 | 2.74358     |
| 13-Tetradecene-1,3-diyne-6,7-diol            | 10.07 | 1.1306 | 2.87E-07 | 2.6971      |
| Cyclocalopin F                               | 8.59  | 1.6785 | 4.79E-07 | 2.5045      |
| (all-E)-6'-Apo-y-caroten-6'-al               | 13.05 | 1.0070 | 2.28E-03 | 0.124565    |
| 2,3-Dehydrosilybin                           | 10.99 | 1.7215 | 1.46E-06 | 2.34593     |
| Blumenol C glucoside                         | 11.89 | 1.3302 | 1.63E-05 | 2.19385     |

|                                                                  |       |        |          |            |
|------------------------------------------------------------------|-------|--------|----------|------------|
| (+)-Lyoniresinol 9-glucoside                                     | 8.60  | 1.6566 | 1.18E-07 | 5.71263    |
| TG(16:0/16:0/22:4(7Z,10Z,13Z,16Z))                               | 17.70 | 1.5048 | 1.15E-12 | 0.0212272  |
| DG(18:2n6/0:0/18:2n6)                                            | 13.01 | 1.4858 | 3.08E-08 | 0.431062   |
| CL(16:0/16:0/16:0/18:1(11Z))                                     | 5.09  | 1.2222 | 3.63E-05 | 0.344913   |
| Casomorphin                                                      | 8.59  | 1.3563 | 2.51E-03 | 0.390886   |
| N-di-Demethyl roxithromycin                                      | 12.46 | 1.4646 | 1.37E-06 | 0.0302254  |
| 3-(3-Hydroxyphenyl)-2-methylpropionic acid                       | 10.43 | 1.3833 | 8.09E-10 | 2.30014    |
| Thiophene-4,5-epoxide                                            | 7.41  | 1.0184 | 2.42E-04 | 0.184928   |
| 4,5-Dihydro-drospirenone-3-sulfate                               | 10.08 | 1.5168 | 6.79E-08 | 4.33228    |
| Doxepin N-oxide glucuronide                                      | 13.49 | 1.0826 | 2.06E-06 | 2.52654    |
| PC(DiMe(9,3)/DiMe(13,5))                                         | 14.72 | 1.0926 | 6.19E-04 | 0.123006   |
| PS(MonoMe(11,5)/DiMe(11,3))                                      | 4.91  | 1.2434 | 1.50E-05 | 0.464931   |
| 3-hydroxypristanic acid                                          | 12.87 | 1.2564 | 1.19E-12 | 2.6073     |
| Pentadecanoylcarnitine                                           | 7.54  | 1.0832 | 3.33E-03 | 0.0194697  |
| N(1)-acetylsperminium(3+)                                        | 7.18  | 1.1773 | 5.57E-03 | 3.06723    |
| N(1),N(12)-diacetylsperminium(2+)                                | 17.07 | 1.4854 | 1.32E-08 | 0.386606   |
| TG(20:0/i-12:0/i-18:0)                                           | 17.65 | 1.4049 | 1.05E-12 | 0.0633687  |
| Leu-Leu-Leu                                                      | 10.74 | 1.3700 | 1.26E-09 | 2.59503    |
| PS(14:1(9Z)/20:5(5Z,8Z,11Z,14Z,17Z))                             | 4.78  | 1.2628 | 3.55E-07 | 0.275991   |
| PS(15:0/24:1(15Z))                                               | 11.01 | 1.0072 | 8.51E-06 | 0.00143887 |
| PS(22:0/15:0)                                                    | 11.43 | 1.2380 | 3.10E-05 | 0.310369   |
| PE-NMe(18:2(9Z,12Z)/18:0)                                        | 12.01 | 1.3854 | 8.33E-06 | 0.11203    |
| PE-NMe(18:3(6Z,9Z,12Z)/22:0)                                     | 11.01 | 1.2039 | 7.53E-04 | 1.93E-05   |
| PE-NMe2(20:0/18:3(6Z,9Z,12Z))                                    | 4.92  | 1.0661 | 9.77E-05 | 0.455242   |
| PE-NMe2(22:6(4Z,7Z,10Z,13Z,16Z,19Z)/22:6(4Z,7Z,10Z,13Z,16Z,19Z)) | 10.85 | 1.2309 | 4.72E-13 | 0.0281825  |
| PA(22:2(13Z,16Z)/15:0)                                           | 18.11 | 1.1531 | 4.99E-05 | 0.118156   |

|                                                                                                                                                                                                                |       |        |          |            |
|----------------------------------------------------------------------------------------------------------------------------------------------------------------------------------------------------------------|-------|--------|----------|------------|
| PA(22:4(7Z,10Z,13Z,16Z)/15:0)                                                                                                                                                                                  | 4.48  | 1.2187 | 2.04E-08 | 0.129405   |
| PA(24:0/22:2(13Z,16Z))                                                                                                                                                                                         | 12.57 | 1.8311 | 7.17E-07 | 0.201049   |
| PG(a-13:0/i-16:0)                                                                                                                                                                                              | 14.02 | 1.2562 | 2.92E-03 | 2.26791    |
| CL(8:0/25:0/a-25:0/a-25:0)                                                                                                                                                                                     | 11.58 | 1.0535 | 5.29E-04 | 9.95E-05   |
| CL(10:0/i-12:0/18:2(9Z,11Z)/18:2(9Z,11Z))                                                                                                                                                                      | 4.71  | 1.2692 | 1.06E-08 | 0.266301   |
| CL(16:0/18:2(9Z,11Z)/18:2(9Z,11Z)/i-24:0)                                                                                                                                                                      | 11.76 | 1.3845 | 3.67E-05 | 0.146838   |
| LysoPE(P-18:0/0:0)                                                                                                                                                                                             | 10.95 | 1.2157 | 2.34E-08 | 5.49731    |
| LysoPG(16:0/0:0)                                                                                                                                                                                               | 11.93 | 1.0006 | 3.88E-08 | 6.65599    |
| 3-Hydroxyeicosanoylcarnitine                                                                                                                                                                                   | 8.30  | 1.1400 | 1.39E-05 | 0.0693049  |
| (4E,6Z)-3-Hydroxydeca-4,6-dienoylcarnitine                                                                                                                                                                     | 11.72 | 2.2794 | 3.11E-08 | 3.40201    |
| 3,8-Dihydroxydecanoylcarnitine                                                                                                                                                                                 | 10.37 | 1.2633 | 6.00E-08 | 3.33821    |
| (4Z)-3-Hydroxytetradec-4-enedioylcarnitine                                                                                                                                                                     | 10.92 | 1.3448 | 2.87E-11 | 2.34358    |
| (9Z)-Nonadec-9-enoylcarnitine                                                                                                                                                                                  | 14.69 | 1.3957 | 1.97E-15 | 0.00229722 |
| 2-Hydroxydocosanoylcarnitine                                                                                                                                                                                   | 8.80  | 1.1274 | 8.43E-06 | 0.032374   |
| Heptacosanoylcarnitine                                                                                                                                                                                         | 14.41 | 1.0062 | 5.22E-03 | 0.107289   |
| 6-Hydroxynon-7-enoylcarnitine                                                                                                                                                                                  | 12.12 | 1.1595 | 5.14E-04 | 0.296376   |
| (5Z)-7-[(1R)-2-[(1E,3S)-3-Hydroxyoct-1-en-1-yl]-5-oxocyclopent-2-en-1-yl]hept-5-enoylcarnitine                                                                                                                 | 8.88  | 1.4022 | 3.97E-06 | 0.185798   |
| (9E,12Z)-10-Nitrooctadeca-9,12-dienoylcarnitine                                                                                                                                                                | 9.97  | 1.0872 | 2.91E-06 | 4.08617    |
| N-Palmitoyl Lysine                                                                                                                                                                                             | 15.78 | 1.1486 | 7.21E-07 | 0.074059   |
| N-Arachidonoyl Tryptophan                                                                                                                                                                                      | 11.72 | 1.6795 | 8.27E-05 | 10.3138    |
| N-Docosahexaenoyl Tryptophan                                                                                                                                                                                   | 4.44  | 1.1756 | 1.42E-06 | 0.105722   |
| N-Nervonoyl Proline                                                                                                                                                                                            | 11.42 | 1.1038 | 1.61E-05 | 3.83734    |
| (2S,3S,5S,8R,9S,10S,13S,14S,16S,17R)-17-Acetyloxy-10,13-dimethyl-2-morpholin-4-yl-16-(1-prop-2-enylpyrrolidin-1-ium-1-yl)-2,3,4,5,6,7,8,9,11,12,14,15,16,17-tetradecahydro-1H-cyclopenta[a]phenanthren-3-olate | 4.95  | 1.1947 | 1.48E-08 | 0.13892    |



|                                                                                                                                                                                                                                                              |       |        |          |           |
|--------------------------------------------------------------------------------------------------------------------------------------------------------------------------------------------------------------------------------------------------------------|-------|--------|----------|-----------|
| (-)-Morphinan                                                                                                                                                                                                                                                | 4.90  | 1.0276 | 1.88E-02 | 0.470222  |
| ((S)-2-((S)-2-((S)-2-((S)-1-(L-Prolyl-L-histidyl)pyrrolidine-2-carboxamido)-3-phenylpropanamido)-3-(1H-imidazol-4-yl)propanamido)-4-methylpentyl)-L-valyl-L-isoleucyl-L-histidyl-L-lysine                                                                    | 8.60  | 1.2255 | 9.89E-04 | 0.0417892 |
| (1E)-1-Phenyltriaz-1-ene                                                                                                                                                                                                                                     | 8.58  | 1.6944 | 1.00E-08 | 9.01469   |
| (1R,4R,4'R,5S,5'S,6R,6'S,7R,9R,11R,12R,13S,14S)-12-[(3R,4S,6R)-4-(Dimethylamino)-3-hydroxy-6-methyloxan-2-yl]oxy-4-ethyl-5,5',6,11-tetrahydroxy-4'-methoxy-4',5,6',7,9,11,13-heptamethylspiro[3,15,17-trioxabicyclo[12.4.0]octadecane-16,2'-oxane]-2,8-dione | 12.20 | 1.8928 | 4.41E-06 | 2.2542    |
| (1R)-3,5,5-Trimethyl-4-[3,7,12,16-tetramethyl-18-(2,6,6-trimethylcyclohexen-1-yl)octadeca-1,3,5,7,9,11,13,15,17-nonaenyl]cyclohex-3-en-1-ol                                                                                                                  | 9.26  | 1.2146 | 1.45E-07 | 0.10675   |
| (2-(4-((2-Chloro-4,4-difluoro-spiro(5H-thieno(2,3-C)pyran-7,4'-piperidine)-1'-yl)methyl)-3-methyl-pyrazol-1-yl)-3-pyridyl)methanol                                                                                                                           | 0.74  | 1.0328 | 5.43E-04 | 0.202452  |
| (2-Acetyloxy-3-hydroxypropyl) (E)-octadec-9-enoate                                                                                                                                                                                                           | 13.06 | 1.3798 | 7.24E-07 | 0.162503  |
| Resiniferatoxin                                                                                                                                                                                                                                              | 13.26 | 1.0417 | 1.11E-07 | 2.28031   |
| 1,25-Dihydroxy-16-ene-vitamin D3                                                                                                                                                                                                                             | 11.51 | 1.2081 | 1.95E-03 | 0.0739225 |
| 1-(6-((3-Methoxyestra-1,3,5(10)-trien-17-yl)amino)hexyl)-1H-pyrrole-2,5-dione                                                                                                                                                                                | 12.05 | 1.5535 | 1.93E-03 | 0.144069  |
| 2,4-Decadienamide,5-(4-methoxyphenyl)-N-[(1R)-1-methyl-4-(3-pyridinyl)butyl]-, (2E,4E)-                                                                                                                                                                      | 11.60 | 1.4462 | 4.78E-09 | 2.70976   |
| 13-Azaprostanoic acid                                                                                                                                                                                                                                        | 8.81  | 1.2958 | 1.48E-03 | 5.29695   |
| N-(3-Aminopropyl)-N-methylcarbamic acid tert-butyl ester                                                                                                                                                                                                     | 12.90 | 1.2900 | 2.29E-11 | 2.5459    |
| 2-(1,2,3,4-Tetrahydroxybutyl)thiazolidine-4-carboxylic acid                                                                                                                                                                                                  | 10.32 | 1.1040 | 1.10E-04 | 0.366314  |
| 2-Aminobicyclo[2.2.1]heptane-2-carboxylic acid                                                                                                                                                                                                               | 2.77  | 1.0997 | 2.77E-04 | 2.59067   |
| Mono(1-ethylhexyl) phthalate                                                                                                                                                                                                                                 | 10.32 | 1.4380 | 4.62E-10 | 3.31902   |
| (5Z,7E)-9,10-Seco-5,7,10(19)-cholestatriene                                                                                                                                                                                                                  | 17.64 | 1.3831 | 3.14E-07 | 0.261673  |
| Tetraethylene glycol monododecyl ether                                                                                                                                                                                                                       | 16.42 | 1.2478 | 3.21E-06 | 2.11011   |

|                                                                                                                              |       |        |          |          |
|------------------------------------------------------------------------------------------------------------------------------|-------|--------|----------|----------|
| 6-n-Octylaminouracil                                                                                                         | 11.03 | 1.1684 | 2.85E-03 | 7.65E-09 |
| Hexa-1,3,5-trienylbenzene                                                                                                    | 8.47  | 1.0271 | 1.63E-05 | 0.357242 |
| N'-[(E)-[5-(Hydroxymethyl)-2-methyl-3-oxopyridin-4-ylidene]methyl]pyridine-4-carbohydrazide                                  | 5.54  | 1.6647 | 6.73E-06 | 4.44764  |
| Albendazole-2-aminosulfone                                                                                                   | 12.45 | 1.2088 | 1.71E-09 | 15.0638  |
| 9-Octadecenamide, N-(2-hydroxyethyl)-, (9Z)-                                                                                 | 16.36 | 1.1346 | 3.96E-07 | 0.109227 |
| Blood group A antigen type 2                                                                                                 | 8.66  | 1.3414 | 9.25E-14 | 0.160711 |
| (E)-4,4'-(Hex-3-ene-3,4-diyl)bis(4,1-phenylene) bis(dihydrogen phosphate)                                                    | 18.08 | 1.0231 | 1.26E-06 | 5.64768  |
| N-[1-[[5-(Diaminomethylideneamino)-1-oxopentan-2-yl]amino]-4-methyl-1-oxopentan-2-yl]-4-methyl-2-(propanoylamino)pentanamide | 12.29 | 1.4897 | 2.37E-06 | 0.145636 |
| s-Triazine, 2-amino-4-((4-methyl-1-piperazinyl)methyl)-6-piperidino-                                                         | 9.96  | 1.1826 | 9.07E-08 | 4.44247  |
| Alloferon                                                                                                                    | 8.60  | 1.5423 | 1.00E-04 | 4.86209  |
| Anisperimus                                                                                                                  | 11.00 | 1.2354 | 9.11E-08 | 7.04036  |
| Arabinofuranosylcytosine triphosphate                                                                                        | 0.99  | 1.2112 | 4.35E-10 | 0.249474 |
| Auristatin E                                                                                                                 | 11.04 | 1.4557 | 1.16E-08 | 6.90722  |
| [5-[2,4-Bis((3S)-3-methylmorpholin-4-yl)pyrido[2,3-d]pyrimidin-7-yl]-2-methoxyphenyl]methanol                                | 14.75 | 1.1077 | 2.27E-05 | 2.93731  |
| Benzodioxaphosphorin                                                                                                         | 8.31  | 1.0475 | 7.75E-04 | 0.342083 |
| beta-Casomorphin-7                                                                                                           | 15.56 | 1.5022 | 4.06E-08 | 0.421324 |
| Bimosiamose                                                                                                                  | 8.59  | 1.6929 | 3.42E-05 | 2.65264  |
| N,N,N',N'-Tetracyclohexyl-3-oxapentanediamide                                                                                | 12.62 | 1.0588 | 1.13E-07 | 3.53667  |
| Cediranib                                                                                                                    | 4.12  | 1.1194 | 1.30E-06 | 0.196896 |
| Cetylmannoside                                                                                                               | 11.47 | 1.2842 | 9.27E-11 | 2.80941  |
| 1-O-Myristoyl-2-acetyl-glycerol                                                                                              | 11.55 | 1.1642 | 6.16E-04 | 3.07378  |
| 3beta-Hydroxy-17-(1H-imidazol-1-yl)androsta-5,16-diene                                                                       | 12.18 | 1.2741 | 4.67E-07 | 0.011575 |
| Ser-Leu-Ile-Gly-Lys-Val                                                                                                      | 4.42  | 1.2130 | 7.03E-08 | 0.379344 |

|                                                                                                                                         |       |        |          |            |
|-----------------------------------------------------------------------------------------------------------------------------------------|-------|--------|----------|------------|
| 7-Nitro-2,3-Dioxo-2,3-Dihydroquinoxaline-6-Carbonitrile                                                                                 | 8.31  | 1.0184 | 7.12E-04 | 0.106691   |
| Chlorfenethol                                                                                                                           | 14.40 | 1.0580 | 3.37E-04 | 2.18462    |
| Chlorotrifluoroethylene                                                                                                                 | 6.66  | 1.3262 | 8.51E-13 | 0.0110335  |
| 2-[[[(1R)-2-[Bis(carboxymethyl)amino]cyclohexyl]-[(2S)-2-[bis(carboxymethyl)amino]-3-(4-isothiocyanatophenyl)propyl]amino]acetic acid   | 8.59  | 1.7283 | 1.69E-06 | 3.13058    |
| Cicaprost                                                                                                                               | 8.80  | 1.3476 | 3.25E-04 | 2.85012    |
| Sulfamide, N,N-dimethyl-N'-((8alpha)-6-propylergolin-8-yl)-                                                                             | 4.12  | 1.1667 | 3.81E-07 | 0.124279   |
| Cyclo(Arg-Gly-Asp-D-Phe-Val)                                                                                                            | 7.67  | 1.1199 | 4.57E-05 | 0.35821    |
| Decachlorobiphenyl                                                                                                                      | 5.50  | 1.5582 | 4.88E-06 | 2.17734    |
| Delapril                                                                                                                                | 8.59  | 1.6784 | 6.13E-07 | 2.37897    |
| Desidustat                                                                                                                              | 10.07 | 1.5486 | 8.35E-10 | 2.34088    |
| 1,1-Bis(2-aminoethyl)-2-hydroxy-3-oxotriazane                                                                                           | 13.28 | 1.2321 | 5.31E-10 | 7.94227    |
| Dibekacin                                                                                                                               | 18.12 | 1.3934 | 6.09E-11 | 0.00235107 |
| Diethylaminoethyl-Sepacel                                                                                                               | 13.35 | 1.2637 | 1.24E-11 | 3.74757    |
| Doqualast                                                                                                                               | 8.60  | 1.7083 | 9.90E-07 | 3.65417    |
| Dropropizine                                                                                                                            | 11.91 | 1.2461 | 1.56E-02 | 2.01328    |
| Enalkiren                                                                                                                               | 11.76 | 2.2691 | 1.12E-09 | 3.01865    |
| ethyl ((3,4,5-trihydroxy-6-((4-(4-isopropoxybenzyl)-1-isopropyl-5-methyl-1H-pyrazol-3-yl)oxy)tetrahydro-2H-pyran-2-yl)methyl) carbonate | 10.88 | 1.4066 | 7.52E-05 | 5.96324    |
| Phenethyl                                                                                                                               | 8.59  | 1.6644 | 3.17E-08 | 2.14921    |
| Exametazime                                                                                                                             | 10.15 | 1.3066 | 2.19E-12 | 5.49924    |
| Floctafenic acid                                                                                                                        | 17.68 | 1.2175 | 5.66E-11 | 6.3033     |
| Fukugiside                                                                                                                              | 8.89  | 1.2175 | 7.20E-07 | 0.0388741  |
| Glucose pyruvate                                                                                                                        | 8.59  | 1.7225 | 1.17E-07 | 3.16766    |
| 3-(3-(N-(2-Chloro-3-trifluoromethylbenzyl)(2,2-diphenylethyl)amino)propoxy)phenylacetic acid                                            | 12.88 | 1.0517 | 2.98E-08 | 4.22607    |

|                                                                                       |       |        |          |             |
|---------------------------------------------------------------------------------------|-------|--------|----------|-------------|
| Val-Gly-Val-Ala-Pro-Gly                                                               | 12.62 | 1.1154 | 4.72E-07 | 4.47198     |
| Hetastarch                                                                            | 0.74  | 1.1172 | 4.69E-06 | 0.124073    |
| N,N-Diallyl-tyrosyl-aminoisobutyryl-aminoisobutyryl-phenylalanyl-leucine              | 13.64 | 1.1077 | 8.31E-06 | 0.4055      |
| l-lysyl-l-lysyl-l-lysine                                                              | 14.15 | 1.0857 | 3.65E-05 | 2.78967     |
| Leptine I                                                                             | 13.68 | 1.2075 | 1.19E-05 | 0.00196321  |
| Lestaurtinib                                                                          | 12.00 | 1.2168 | 8.51E-09 | 3.88899     |
| linoleoyl-dioleoyl-glycerol                                                           | 18.10 | 1.2989 | 1.18E-06 | 0.0516264   |
| Lurasidone                                                                            | 18.01 | 1.3209 | 1.31E-03 | 0.188273    |
| (3-{[3-(2-Amino-2-Oxoethyl)-1-Benzyl-2-Ethyl-1h-Indol-5-Yl]oxy}propyl)phosphonic Acid | 8.59  | 1.6883 | 2.52E-05 | 2.06347     |
| 1-Methyl-5-(4-benzoyl)pyrrole-2-acetic acid 2-(theophylline-7-yl)ethyl ester          | 8.09  | 1.1789 | 4.36E-03 | 2.79254     |
| Methyl 20-dihydroprednisolunate                                                       | 10.68 | 1.5381 | 5.04E-04 | 335.918     |
| Milbemycin A3                                                                         | 10.68 | 1.5139 | 4.83E-04 | 301.663     |
| Milbemycin beta1                                                                      | 12.82 | 1.5242 | 3.95E-03 | 0.199917    |
| Midecamycin acetate                                                                   | 12.50 | 1.3226 | 4.05E-06 | 0.140321    |
| Avemectin B1                                                                          | 4.90  | 1.2206 | 4.17E-06 | 0.49619     |
| Dimercaptosuccinic acid monomethyl ester                                              | 7.23  | 1.4709 | 1.51E-08 | 2.83455     |
| Mycobactin J                                                                          | 10.95 | 1.2777 | 3.78E-06 | 0.098187    |
| N-Acetyl-S-benzyl-L-cysteine                                                          | 8.63  | 1.0738 | 9.65E-05 | 0.0620085   |
| N-Desethyl Sunitinib                                                                  | 9.72  | 1.1329 | 4.14E-03 | 0.000231722 |
| N-Methacryloyl-L-glutamic acid                                                        | 8.71  | 1.8808 | 5.71E-04 | 2.29707     |
| N-Methoxysuccinyl-Ala-Ala-Pro-Val                                                     | 9.00  | 1.1029 | 2.56E-03 | 0.0235405   |
| N(4)-Oleylcytosine arabinoside                                                        | 10.29 | 1.1348 | 4.87E-06 | 5.61136     |
| (2R)-1-(4-Nonylphenyl)propan-2-amine                                                  | 13.56 | 1.2925 | 4.94E-08 | 0.27505     |
| 1,1,1-Trifluorohenicosa-6,9,12,15-tetraene                                            | 4.78  | 1.2462 | 9.02E-07 | 0.216131    |
| NeuAc(alpha->6)GalNAc(alpha1->O)Ser                                                   | 9.75  | 1.2653 | 1.04E-08 | 0.419323    |

|                                                                                                                        |       |        |          |            |
|------------------------------------------------------------------------------------------------------------------------|-------|--------|----------|------------|
| oleandomycin                                                                                                           | 11.55 | 2.2712 | 1.82E-07 | 4.94682    |
| (2S)-2-[[[(2R)-3-[2,3-Di(hexadecanoyloxy)propylsulfanyl]-2-(hexadecanoylamino)propanoyl]amino]-3-hydroxypropanoic acid | 4.71  | 1.1399 | 3.59E-04 | 0.328213   |
| 1,1,1-Trifluoroheptadecan-2-one                                                                                        | 10.26 | 1.1129 | 6.22E-08 | 19.4292    |
| 3-(4-Iodophenyl)-2-mercapto-(Z)-2-propenoic acid                                                                       | 18.15 | 1.2897 | 9.16E-09 | 2.00846    |
| Pentisomide                                                                                                            | 13.97 | 1.3063 | 2.43E-06 | 0.13729    |
| Phenylphosphonic acid                                                                                                  | 9.90  | 1.1699 | 2.33E-05 | 0.316912   |
| Phosphoramidon                                                                                                         | 11.41 | 1.0575 | 8.80E-09 | 9.05473    |
| Phytantriol                                                                                                            | 9.37  | 1.2849 | 6.66E-04 | 7.85831    |
| Reproterol                                                                                                             | 6.99  | 1.5173 | 7.14E-05 | 123.473    |
| 1-(2-(1-Adamantyl)ethyl)-1-pentyl-3-(3-(4-pyridyl)propyl)urea                                                          | 11.72 | 1.7552 | 2.26E-08 | 0.130962   |
| Sar chelate                                                                                                            | 11.72 | 1.2791 | 3.40E-11 | 6.54541    |
| 3,3-Bis(carboxymethyl)hexadecanedioic acid                                                                             | 10.92 | 1.4003 | 4.58E-12 | 2.75991    |
| 9-(Formyloxymethyl)-9H-fluorene-2-sulfonic acid                                                                        | 9.18  | 1.1716 | 8.69E-07 | 2.81443    |
| Methylglyoxal-bis-guanylhyazone                                                                                        | 11.31 | 1.4110 | 2.19E-09 | 2.92173    |
| (1R,2S,4S,6R,7S,8R,9S,12S,13S)-7,9,13-Trimethyl-6-(3-methylbutyl)-5-oxapentacyclo[10.8.0.02,9.04,8.013,18]icosan-16-ol | 15.66 | 1.2617 | 3.52E-08 | 0.358134   |
| Solasonine                                                                                                             | 13.64 | 1.2972 | 1.60E-10 | 0.106242   |
| 3-((((Oxoheptyl)amino)acetyl)amino)methyl-7-oxobicyclo(2.2.1)hept-2-yl-5-heptenoic acid                                | 10.11 | 1.0479 | 3.83E-08 | 5.14413    |
| Streptidine                                                                                                            | 8.47  | 1.0420 | 2.64E-05 | 0.438166   |
| Tetranorprostanedioic acid                                                                                             | 12.31 | 1.3350 | 1.79E-13 | 2.76352    |
| TETRATHIONIC ACID                                                                                                      | 18.17 | 1.1311 | 1.21E-03 | 0.150101   |
| Candidin                                                                                                               | 11.01 | 1.2066 | 1.36E-04 | 0.0405775  |
| N,N-Diisopropyl-N'-isoamyl-N'-diethylaminoethylurea                                                                    | 11.68 | 1.3196 | 8.83E-11 | 2.23997    |
| VAPIPROST                                                                                                              | 14.13 | 1.4307 | 1.80E-12 | 0.00903729 |

|                                                                                                                                             |       |        |          |             |
|---------------------------------------------------------------------------------------------------------------------------------------------|-------|--------|----------|-------------|
| ZORUBICIN                                                                                                                                   | 16.93 | 1.0252 | 2.06E-04 | 3.99213     |
| 4-((4-(2-(6-((2R)-2-(2,4-Difluorophenyl)-1,1-difluoro-2-hydroxy-3-(1H-tetrazol-1-yl)propyl)-3-pyridinyl)ethynyl)phenoxy)methyl)benzonitrile | 5.58  | 1.1121 | 3.01E-09 | 4.20112     |
| PE(LTE4/18:0)                                                                                                                               | 13.69 | 1.6820 | 5.78E-06 | 0.00903752  |
| PE(20:0/PGF1alpha)                                                                                                                          | 11.90 | 1.1822 | 1.04E-05 | 0.437786    |
| PA(20:0/LTE4)                                                                                                                               | 11.66 | 1.2776 | 8.51E-05 | 0.000637439 |
| PA(20:1(11Z)/LTE4)                                                                                                                          | 13.40 | 1.1779 | 2.26E-08 | 5.87E-05    |
| PA(20:2(11Z,14Z)/LTE4)                                                                                                                      | 13.18 | 1.0772 | 1.18E-03 | 0.49175     |
| PA(LTE4/20:2(11Z,14Z))                                                                                                                      | 12.03 | 1.4280 | 4.24E-10 | 0.175886    |
| PA(LTE4/22:1(13Z))                                                                                                                          | 15.10 | 1.1767 | 4.66E-05 | 0.0026517   |
| PA(22:6(4Z,7Z,10Z,13Z,16Z,19Z)/PGE2)                                                                                                        | 11.69 | 1.3384 | 1.74E-05 | 0.0420775   |
| PA(PGE2/22:6(4Z,7Z,10Z,13Z,16Z,19Z))                                                                                                        | 12.73 | 1.3092 | 3.39E-05 | 0.143043    |
| PA(a-25:0/20:4(7E,9E,11Z,13E)-3OH(5S,6R,15S))                                                                                               | 10.30 | 1.9110 | 6.41E-07 | 0.136032    |
| PG(a-17:0/PGF1alpha)                                                                                                                        | 13.64 | 1.6185 | 7.40E-08 | 0.163744    |
| PG(a-21:0/PGF2alpha)                                                                                                                        | 15.69 | 1.4452 | 1.39E-08 | 0.038785    |
| PGP(20:3(8Z,11Z,14Z)-O(5,6)/a-13:0)                                                                                                         | 4.78  | 1.2500 | 3.65E-07 | 0.421202    |
| PGP(i-14:0/20:3(8Z,11Z,14Z)-2OH(5,6))                                                                                                       | 11.05 | 1.3674 | 6.16E-06 | 0.00252928  |
| PI(PGF1alpha/16:0)                                                                                                                          | 10.82 | 1.1136 | 5.36E-05 | 0.162605    |
| PI(18:0/20:4(6E,8Z,11Z,14Z)-OH(5S))                                                                                                         | 11.69 | 1.4488 | 3.85E-07 | 0.00162038  |
| PI(20:0/18:1(12Z)-2OH(9,10))                                                                                                                | 13.69 | 1.0887 | 9.84E-07 | 0.11204     |
| PI(20:0/20:3(6,8,11)-OH(5))                                                                                                                 | 14.64 | 1.4335 | 1.67E-09 | 0.160579    |
| PS(18:1(12Z)-2OH(9,10)/18:0)                                                                                                                | 13.86 | 1.2524 | 3.41E-05 | 0.139842    |
| PS(20:5(7Z,9Z,11E,13E,17Z)-3OH(5,6,15)/18:3(6Z,9Z,12Z))                                                                                     | 13.42 | 1.2903 | 4.42E-09 | 0.11868     |
| PS(PGJ2/20:1(11Z))                                                                                                                          | 13.69 | 1.3364 | 6.55E-06 | 0.0528001   |
| PS(22:0/20:4(6Z,8E,10E,14Z)-2OH(5S,12R))                                                                                                    | 15.49 | 1.2763 | 1.63E-11 | 0.00395003  |
| PS(20:3(8Z,11Z,14Z)-2OH(5,6)/22:0)                                                                                                          | 15.56 | 1.2902 | 3.90E-13 | 0.308677    |

|                                                           |       |        |          |             |
|-----------------------------------------------------------|-------|--------|----------|-------------|
| PS(22:1(13Z)/PGF1alpha)                                   | 15.10 | 1.2222 | 8.15E-06 | 0.0570995   |
| PS(24:0/PGF2alpha)                                        | 14.63 | 1.1891 | 1.39E-03 | 0.0134708   |
| PS(PGF2alpha/24:0)                                        | 15.10 | 1.1328 | 2.37E-03 | 0.0256448   |
| PS(20:3(8Z,11Z,14Z)-2OH(5,6)/24:0)                        | 15.55 | 1.0138 | 6.14E-03 | 0.0227572   |
| PS(24:0/5-iso PGF2VI)                                     | 14.12 | 1.2894 | 6.97E-11 | 0.00513811  |
| PS(5-iso PGF2VI/24:0)                                     | 14.64 | 1.3075 | 4.44E-11 | 0.166674    |
| PE(22:0/PGJ2)                                             | 11.39 | 1.0288 | 2.30E-06 | 0.00200735  |
| PE(22:2(13Z,16Z)/22:5(4Z,7Z,10Z,13Z,19Z)-O(16,17))        | 4.91  | 1.3553 | 4.81E-12 | 0.00826302  |
| PE(24:0/20:3(6,8,11)-OH(5))                               | 5.00  | 1.2448 | 1.06E-04 | 0.0217414   |
| PE(LTE4/P-16:0)                                           | 18.12 | 1.4061 | 5.43E-13 | 0.00390561  |
| PC(15:0/18:2(10E,12Z)+=O(9))                              | 18.11 | 1.3590 | 2.46E-05 | 0.0335241   |
| PC(16:0/TXB2)                                             | 4.45  | 1.0591 | 4.53E-06 | 0.247436    |
| PC(20:3(5Z,8Z,11Z)/6 keto-PGF1alpha)                      | 14.76 | 1.1761 | 1.95E-04 | 0.00993139  |
| PC(22:6(4Z,7Z,10Z,13Z,16Z,19Z)/PGJ2)                      | 18.10 | 1.0311 | 1.16E-05 | 0.0485146   |
| PC(22:6(4Z,7Z,10Z,13Z,16Z,19Z)/20:4(6E,8Z,11Z,14Z)+=O(5)) | 18.17 | 1.2186 | 2.18E-05 | 0.458302    |
| PC(24:0/PGF2alpha)                                        | 4.31  | 1.1135 | 1.60E-04 | 0.0608814   |
| PC(DiMe(9,3)/5-iso PGF2VI)                                | 12.03 | 1.3020 | 3.14E-05 | 0.078644    |
| PC(P-18:0/20:4(6E,8Z,11Z,14Z)-OH(5S))                     | 13.04 | 1.2926 | 9.04E-05 | 0.0558849   |
| PC(P-18:0/PGF2alpha)                                      | 4.76  | 1.3667 | 1.83E-09 | 0.00748857  |
| PC(20:3(6,8,11)-OH(5)/P-18:0)                             | 12.01 | 1.1688 | 8.92E-04 | 0.000120354 |
| Cer(d16:1/PGJ2)                                           | 10.99 | 1.0825 | 2.43E-02 | 2.30291     |
| Cer(d20:1/18:1(12Z)-2OH(9,10))                            | 13.88 | 1.2528 | 2.66E-04 | 6.58269     |
| Cer(t18:0/5-iso PGF2VI)                                   | 18.10 | 1.3070 | 8.29E-08 | 0.0151203   |
| SM(d17:1/20:3(5Z,8Z,11Z)-O(14R,15S))                      | 5.58  | 1.3443 | 4.68E-05 | 0.0107848   |
| SM(d17:1/20:5(7Z,9Z,11E,13E,17Z)-3OH(5,6,15))             | 10.58 | 1.0506 | 2.28E-04 | 4.53E-05    |
| SM(d18:0/20:3(6,8,11)-OH(5))                              | 5.57  | 1.3550 | 1.02E-08 | 2.54978     |

|                                                      |       |        |          |             |
|------------------------------------------------------|-------|--------|----------|-------------|
| SM(d19:0/LTE4)                                       | 5.01  | 1.2844 | 8.42E-08 | 0.185906    |
| SM(d20:1/20:4(5Z,8Z,11Z,14Z)-OH(19S))                | 13.04 | 1.2628 | 8.75E-08 | 0.111535    |
| SM(d20:1/LTE4)                                       | 12.01 | 1.7221 | 6.79E-06 | 0.0173698   |
| DG(10:0/20:5(7Z,9Z,11E,13E,17Z)-3OH(5,6,15)/0:0)     | 10.28 | 2.0080 | 5.97E-05 | 0.165734    |
| DG(12:0/6 keto-PGF1alpha/0:0)                        | 10.91 | 1.3769 | 1.31E-07 | 0.247097    |
| DG(13:0/20:4(6Z,8E,10E,14Z)-2OH(5S,12R)/0:0)         | 15.34 | 1.3455 | 8.43E-04 | 0.147771    |
| DG(15:0/20:3(8Z,11Z,14Z)-2OH(5,6)/0:0)               | 8.66  | 1.2083 | 2.19E-05 | 0.224315    |
| DG(20:4(6E,8Z,11Z,13E)-2OH(5S,15S)/15:0/0:0)         | 16.43 | 1.3309 | 1.66E-04 | 0.254459    |
| DG(22:6(4Z,7Z,11E,13Z,15E,19Z)-2OH(10S,17)/15:0/0:0) | 13.88 | 1.2327 | 5.11E-05 | 2.65255     |
| DG(17:0/6 keto-PGF1alpha/0:0)                        | 4.32  | 1.2301 | 7.67E-08 | 0.396765    |
| DG(17:0/PGF1alpha/0:0)                               | 4.80  | 1.3202 | 4.97E-12 | 0.449314    |
| DG(18:0/20:3(6,8,11)-OH(5)/0:0)                      | 18.12 | 1.3177 | 3.67E-14 | 0.0441212   |
| DG(8:0/20:3(8Z,11Z,14Z)-2OH(5,6)/0:0)                | 15.56 | 1.5820 | 3.57E-06 | 0.433686    |
| DG(PGF2alpha/a-25:0/0:0)                             | 10.30 | 1.0117 | 1.95E-04 | 0.0320619   |
| DG(a-25:0/PGJ2/0:0)                                  | 11.76 | 1.3587 | 2.74E-08 | 0.122014    |
| DG(a-25:0/PGF1alpha/0:0)                             | 12.21 | 1.5048 | 1.83E-08 | 0.00227502  |
| DG(PGF1alpha/a-25:0/0:0)                             | 13.35 | 1.4432 | 3.95E-07 | 0.000858881 |
| Serylvalylglycylglutamic acid                        | 0.75  | 1.1530 | 1.05E-03 | 25.2493     |
| Psilostachyin                                        | 8.59  | 1.6650 | 4.02E-07 | 3.72582     |
| 2,4-Dimethylquinoline                                | 9.93  | 1.3121 | 4.96E-05 | 0.032204    |
| alpha-Allocryptopine                                 | 9.90  | 1.0773 | 4.83E-09 | 7.99434     |
| Celosianin                                           | 10.27 | 1.4776 | 7.40E-04 | 2.31927     |
| Lactupicrin methyl ester                             | 8.59  | 1.3453 | 1.16E-03 | 0.149436    |
| Aluminum oleate                                      | 18.09 | 1.3557 | 2.59E-07 | 0.0133702   |
| Calcium oleate                                       | 10.77 | 1.1652 | 4.59E-07 | 0.398378    |
| Poly(acrylic acid-co-hypophosphite), sodium salt     | 6.57  | 1.2511 | 7.27E-09 | 0.0215291   |



|                                                                            |       |        |          |           |
|----------------------------------------------------------------------------|-------|--------|----------|-----------|
| Polyglycerol esters of fatty acids                                         | 13.05 | 1.2953 | 1.02E-11 | 3.17129   |
| Sodium palmitate                                                           | 10.15 | 1.2995 | 2.83E-10 | 2.67924   |
| Sodium stearyl fumarate                                                    | 9.42  | 1.0141 | 4.52E-07 | 6.22039   |
| Succistearin                                                               | 5.40  | 2.0190 | 5.86E-05 | 3.81891   |
| Magnesium dodecanoate                                                      | 12.62 | 1.0453 | 8.99E-07 | 4.59812   |
| Curvacin A                                                                 | 4.82  | 1.3257 | 1.27E-12 | 0.0492153 |
| [Ethylenebis(dithiocarbamate)]manganese                                    | 18.18 | 1.3131 | 4.54E-08 | 0.136216  |
| 8'-Apo-b-caroten-8'-ol                                                     | 4.92  | 1.3188 | 1.96E-11 | 0.317257  |
| 2-Hydroxyglutaric acid diethyl ester                                       | 12.31 | 1.3065 | 1.23E-11 | 2.15427   |
| octanoate                                                                  | 7.63  | 1.2354 | 3.20E-09 | 0.293787  |
| Cyanidin 3-O-(6"-dioxalyl-glucoside)                                       | 17.62 | 1.0637 | 8.62E-04 | 3.68E-05  |
| Asn-Arg-Ala-Ile                                                            | 17.21 | 1.2881 | 5.24E-09 | 5.73982   |
| Lys-Asp-Tyr                                                                | 6.62  | 1.4644 | 4.26E-05 | 0.137975  |
| Gum arabic                                                                 | 9.24  | 1.2287 | 9.46E-04 | 0         |
| Serdexmethylphenidate                                                      | 5.50  | 1.6923 | 4.80E-06 | 2.03923   |
| Avapritinib                                                                | 11.89 | 1.3406 | 6.51E-06 | 2.0299    |
| n-decanohydroxamic acid                                                    | 12.63 | 1.3181 | 4.76E-10 | 2.63773   |
| Valproic acid                                                              | 10.48 | 1.4104 | 3.14E-09 | 2.27628   |
| 4,7,10,13,16,19-Docosahexaynoic acid                                       | 9.68  | 1.0248 | 9.44E-04 | 2.3738    |
| 5,8,11,14-Octadecatetraynoic acid                                          | 8.60  | 1.6751 | 5.26E-07 | 2.75361   |
| 4-Methyl-3Z,5-hexadienoic acid                                             | 8.59  | 1.6997 | 1.45E-08 | 3.55058   |
| 26:6(8Z,11Z,14Z,17Z,20Z,23Z)                                               | 10.54 | 1.0205 | 9.41E-03 | 0.489934  |
| methyl 8-[3,5-epidioxy-2-(3-hydroperoxy-1-pentenyl)-cyclopentyl]-octanoate | 8.18  | 1.3751 | 1.38E-06 | 0.217291  |
| 6-bromo-23-methyl-tetracos-5E,9Z-dienoic acid                              | 15.46 | 1.0686 | 1.61E-04 | 2.40289   |
| Oncobic acid                                                               | 9.52  | 1.0841 | 1.51E-06 | 7.68757   |
| alpha,alpha'-Trehalose 6-mycolate                                          | 11.73 | 1.0273 | 8.41E-04 | 0.0432153 |

|                                                                                   |       |        |          |            |
|-----------------------------------------------------------------------------------|-------|--------|----------|------------|
| Tetranor-PGF1alpha                                                                | 11.76 | 1.7197 | 7.58E-09 | 0.313842   |
| Linoleyl palmitate                                                                | 10.62 | 1.2498 | 6.89E-10 | 0.269559   |
| 3-acetyl-3-methyldihydrofuran-2(3H)-one                                           | 11.89 | 1.2986 | 3.42E-05 | 2.1739     |
| N,N-(2,2-dihydroxy-ethyl) arachidonoyl amine                                      | 12.63 | 1.2927 | 1.99E-11 | 3.50675    |
| (+/-)N-(2-fluro-ethyl)-2,16,16-trimethyl-5Z,8Z,11Z,14Z-docosatetraenoyl amine     | 16.85 | 1.1832 | 4.17E-07 | 0.499082   |
| N-oleoyl tryptophan                                                               | 12.03 | 1.6427 | 7.76E-04 | 20.8673    |
| Anandamide (20:2, n-6)                                                            | 10.52 | 1.3649 | 2.73E-10 | 2.20396    |
| Anandamide (20:1, n-9)                                                            | 12.47 | 1.3461 | 8.34E-12 | 3.59931    |
| Oleoyl-EA(d2)                                                                     | 12.82 | 1.1351 | 3.40E-07 | 2.26548    |
| 9Z,19Z-Heptatriacontadiene                                                        | 7.06  | 1.0945 | 3.56E-04 | 0.174874   |
| 1-O-alpha-D-glucopyranosyl-(2-tetradecanoyloxy)-eicosan-1-ol                      | 14.81 | 1.1166 | 1.74E-04 | 0.324963   |
| DG(20:5(5Z,8Z,11Z,14Z,17Z)/0:0/20:5(5Z,8Z,11Z,14Z,17Z)) (d5)                      | 14.33 | 1.1212 | 5.01E-05 | 0.189746   |
| DG(20:4(5Z,8Z,11Z,14Z)/0:0/20:4(5Z,8Z,11Z,14Z)) (d5)                              | 18.12 | 1.2702 | 1.54E-07 | 0.160799   |
| DG(18:0/0:0/18:0) (d5)                                                            | 11.05 | 1.1027 | 3.10E-05 | 0.0202191  |
| DG(O-16:0/18:1(9Z))                                                               | 13.66 | 1.1011 | 2.27E-03 | 2.11238    |
| 1-(14-methyl-pentadecanoyl)-2-(8-[3]-ladderane-octanyl)-sn-glycerol               | 18.12 | 1.3360 | 2.17E-15 | 0.0319352  |
| TG(20:2(11Z,14Z)/18:3(6Z,9Z,12Z)/20:2(11Z,14Z)) (d5)                              | 16.22 | 1.2794 | 1.79E-08 | 0.024853   |
| TG(20:4(5Z,8Z,11Z,14Z)/18:2(9Z,12Z)/20:4(5Z,8Z,11Z,14Z)) (d5)                     | 16.15 | 1.0967 | 8.19E-11 | 0.0321281  |
| SQDG(22:5(5Z,8Z,11Z,14Z,17Z)/16:1(13Z))                                           | 4.90  | 1.1762 | 2.92E-05 | 0.35794    |
| PC(18:1(17Z)/18:1(17Z))                                                           | 11.77 | 1.2023 | 3.68E-08 | 0.0612193  |
| PC(22:0/22:1(13Z))                                                                | 12.14 | 1.1250 | 1.32E-03 | 0.305774   |
| PC(O-14:0/18:0)                                                                   | 11.56 | 1.4135 | 4.04E-11 | 8.74469    |
| PC(O-6:0/O-6:0)                                                                   | 11.52 | 1.0081 | 1.82E-05 | 2.3187     |
| 1-(6-[3]-ladderane-hexanoyl)-2-(8-[3]-ladderane-octanyl)-sn-glycerophosphocholine | 16.42 | 1.2073 | 1.13E-05 | 0.448109   |
| PE(21:0/22:6(4Z,7Z,10Z,13Z,16Z,19Z))                                              | 13.06 | 1.1928 | 6.81E-04 | 0.00621421 |
| PE(18:4(6Z,9Z,12Z,15Z)/18:4(6Z,9Z,12Z,15Z))                                       | 4.64  | 1.2228 | 3.99E-08 | 0.203704   |

|                                                     |       |        |          |             |
|-----------------------------------------------------|-------|--------|----------|-------------|
| PE(19:0/18:1(9Z))                                   | 11.76 | 1.4000 | 5.39E-06 | 0.184222    |
| PE(P-19:1(12Z)/0:0)                                 | 12.36 | 1.1385 | 8.04E-03 | 0.0742887   |
| PS(19:0/20:4(5Z,8Z,11Z,14Z))                        | 10.26 | 1.3205 | 1.45E-04 | 0.000984289 |
| PG(14:1(9Z)/14:1(9Z))                               | 15.34 | 1.3103 | 7.40E-04 | 0.456334    |
| PG(O-18:0/14:0)                                     | 12.22 | 1.7869 | 2.44E-08 | 2.60268     |
| PG(12:0/0:0)                                        | 9.00  | 1.6100 | 2.61E-06 | 3.76354     |
| PG(22:4(7Z,10Z,13Z,16Z)/0:0)                        | 15.99 | 1.3735 | 1.04E-06 | 0.0325794   |
| PI(18:2(9Z,12Z)/22:1(11Z))                          | 15.56 | 1.2414 | 1.60E-07 | 0.297844    |
| PI(19:1(9Z)/19:1(9Z))                               | 14.70 | 1.2894 | 1.97E-06 | 0.108473    |
| PI(16:0/20:3(8Z,11Z,14Z))                           | 14.72 | 1.2396 | 5.62E-06 | 0.274548    |
| PI(O-16:0/13:0)                                     | 10.18 | 1.0478 | 1.22E-02 | 0.0187472   |
| PI(O-18:0/21:0)                                     | 11.26 | 1.4642 | 3.99E-06 | 2.09301     |
| PI(O-20:0/22:0)                                     | 4.57  | 1.1067 | 3.61E-05 | 0.209348    |
| Archaetidylglycerol-myo-inositol                    | 5.00  | 1.2495 | 5.54E-07 | 0.245773    |
| PA(17:0/22:6(4Z,7Z,10Z,13Z,16Z,19Z))                | 4.53  | 1.1307 | 6.82E-08 | 0.139656    |
| PA(O-18:0/17:0)                                     | 11.76 | 1.2362 | 2.11E-07 | 0.284243    |
| PA(O-18:0/18:3(6Z,9Z,12Z))                          | 18.11 | 1.0797 | 7.82E-03 | 0.007093    |
| PA(O-20:0/17:2(9Z,12Z))                             | 13.04 | 1.3691 | 3.25E-09 | 4.14281     |
| PA(O-16:0/20:5(5Z,8Z,11Z,14Z,17Z))                  | 12.13 | 1.2736 | 4.01E-06 | 0.219152    |
| N-(3E-hexadecenoyl)-deoxysphing-4-enine-1-sulfonate | 10.81 | 1.2034 | 3.60E-07 | 0.420348    |
| Prosopinine                                         | 17.65 | 1.4191 | 7.22E-06 | 0.280407    |
| N,N-dimethyl-Safingol                               | 12.01 | 1.3488 | 1.85E-10 | 4.56876     |
| LacCer(d18:1/24:1(15Z))                             | 18.12 | 1.0382 | 1.35E-02 | 0.00277453  |
| GalCer(d18:1/24:0)                                  | 15.23 | 1.1803 | 2.26E-09 | 0.000196077 |
| GalCer(d18:1/26:1(17Z))                             | 18.10 | 1.2886 | 5.19E-08 | 0.0321327   |
| (3'-sulfo)Galbeta-Cer(d18:1/16:0(2OH))              | 18.10 | 1.4476 | 6.06E-09 | 0.00503569  |

|                                        |       |        |          |            |
|----------------------------------------|-------|--------|----------|------------|
| (3'-sulfo)Galbeta-Cer(d18:0/18:0(2OH)) | 18.17 | 1.1876 | 1.47E-06 | 0.00479343 |
| C24:1 Sulfatide                        | 13.19 | 1.2215 | 9.00E-06 | 0.31692    |

---
